# Supplementary material for: Infection dynamics of COVID-19 virus under lockdown and reopening
Source: Springer Nature journal article supplement (doi:10.1038/s41598-022-05333-5), 2022-01-27
Supplement: 41598_2022_5333_MOESM1_ESM.pdf [file 41598_2022_5333_MOESM1_ESM.pdf]

# Supplementary Information: Infection dynamics of COVID-19 virus under lockdown and reopening

Jakub Svoboda<sup>a</sup>, Josef Tkadlec<sup>b</sup>, Andreas Pavlogiannis<sup>c</sup>, Krishnendu Chatterjee<sup>a</sup>, and Martin A. Nowak<sup>b,d,\*</sup>

<sup>a</sup>IST Austria, Klosterneuburg, A-3400, Austria

<sup>b</sup>Harvard University, Department of Mathematics, Cambridge, MA 02138, USA

<sup>c</sup>Aarhus University, Department of Computer Science, 8200 Aarhus, Denmark

<sup>d</sup>Harvard University, Department of Organismic and Evolutionary Biology, Cambridge, MA 02138, USA

\*martin.nowak@harvard.edu

## ABSTRACT

This is a Supplementary Information for the manuscript “Infection dynamics of COVID-19 virus under lockdown and reopening”. It includes three additional figures.

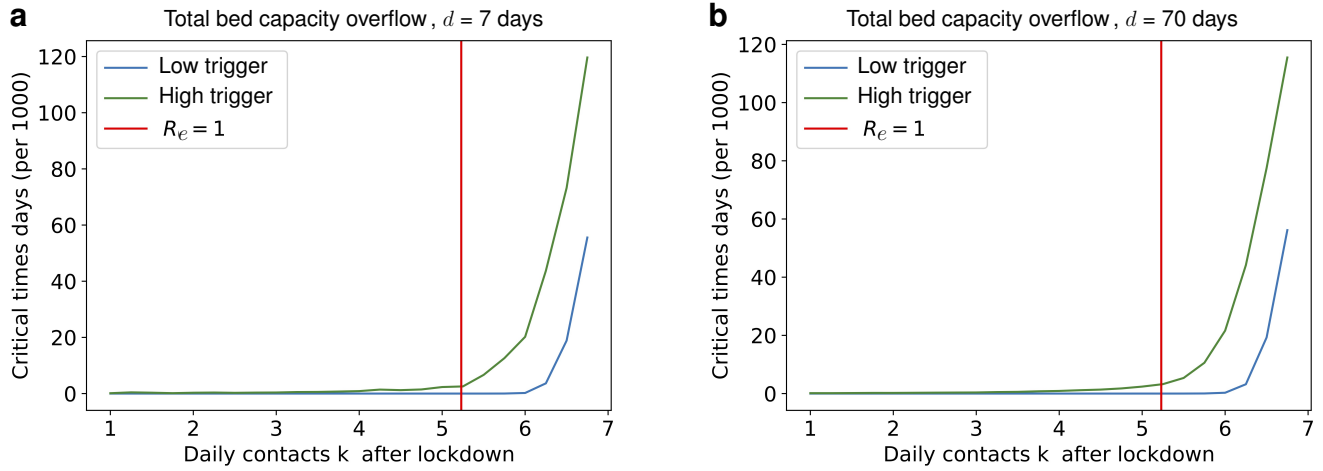

**Supplementary Figure 1. Another performance measure: The total (expected) overflow of the bed capacity, per 1000 individuals.** For a given stochastic run, the total bed capacity overflow is defined as  $\sum_{t \geq 0} \max\{C(t) - c, 0\}$ , where  $C_t$  is the number of critical cases on day  $t$ . The parameters are as in Fig. 3 from the main text ( $\tau_{\text{low}} = 3$ ,  $\tau_{\text{high}} = 12$ ,  $k^* \doteq 5.3$ , the patience parameter is **a**,  $d = 7$  days and **b**,  $d = 70$  days). We note that for high-trigger policies and  $k < k^*$ , the total bed capacity overflow is negligible, even though the overflow probability  $p_{\text{fail}}$  is substantial (see Fig. 3b from the main text).

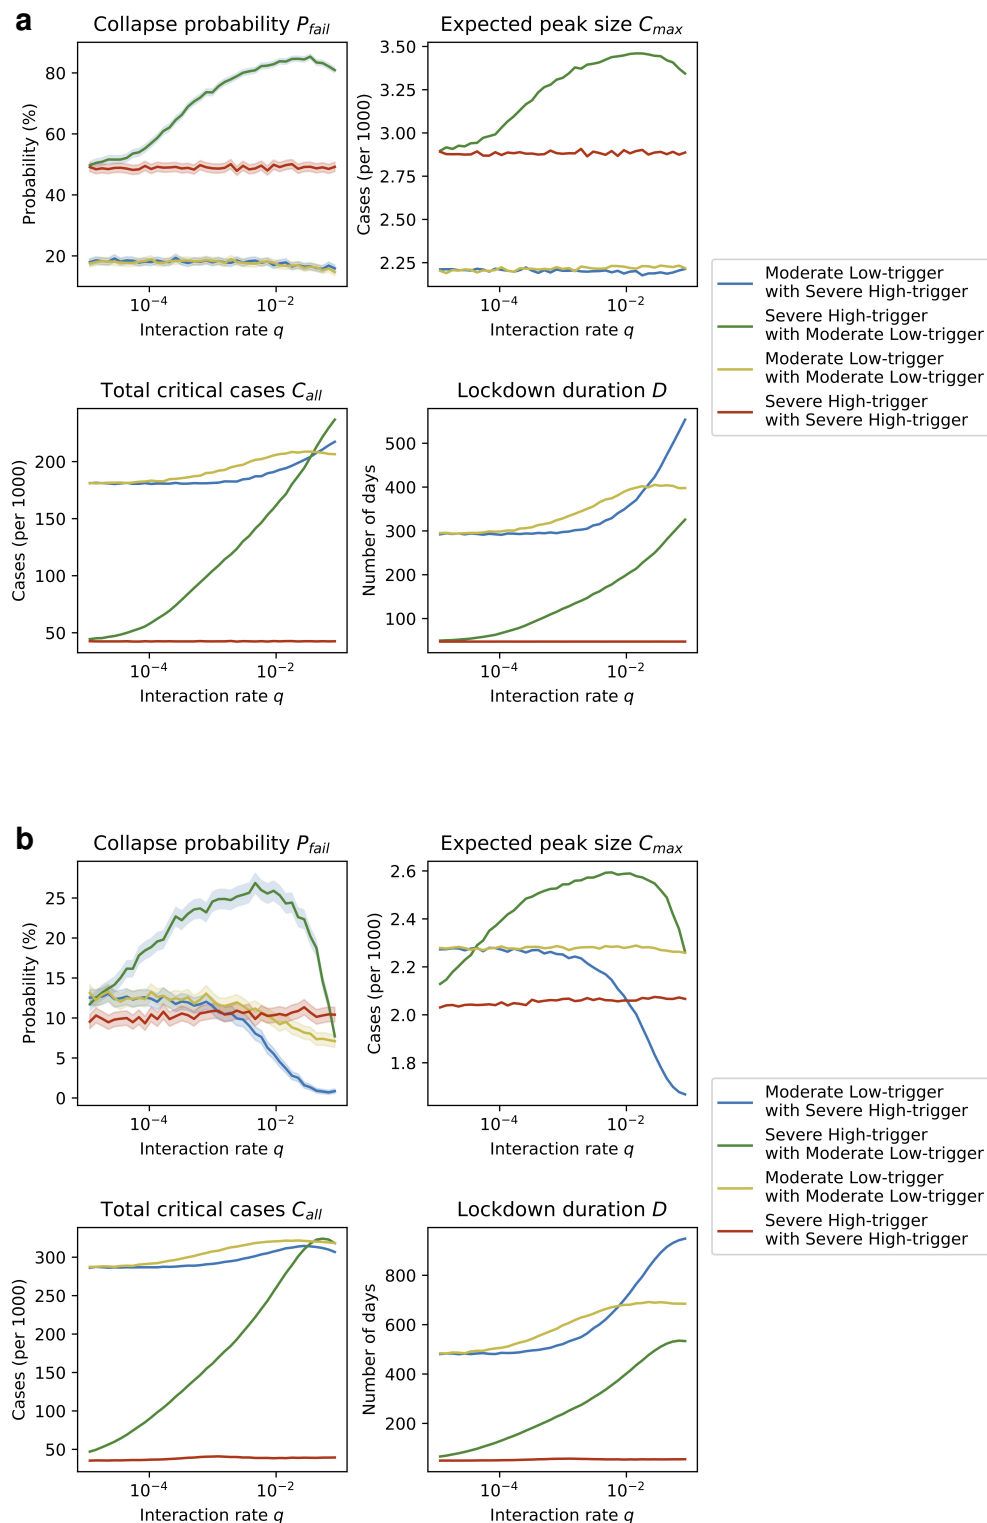

**Supplementary Figure 2. Different parameter choices.** We perform the computation leading to Fig. 4 from the main text for different parameter choices. In order to keep the reproductive ratio roughly fixed, we always vary two parameters at a time. **a**, We consider a population with  $2\times$  shorter infectious period  $X_{I\rightarrow R} = 5$  days, and roughly  $2\times$  larger individual transmission rate  $p = 3.6\%$ . **b**, We consider a population with  $3\times$  as many contacts  $k_0 = 45$  and  $3\times$  smaller individual transmission rate  $p = 0.67\%$ . In both cases, the trends in the resulting plots are qualitatively the same as in Fig. 4 from the main text.

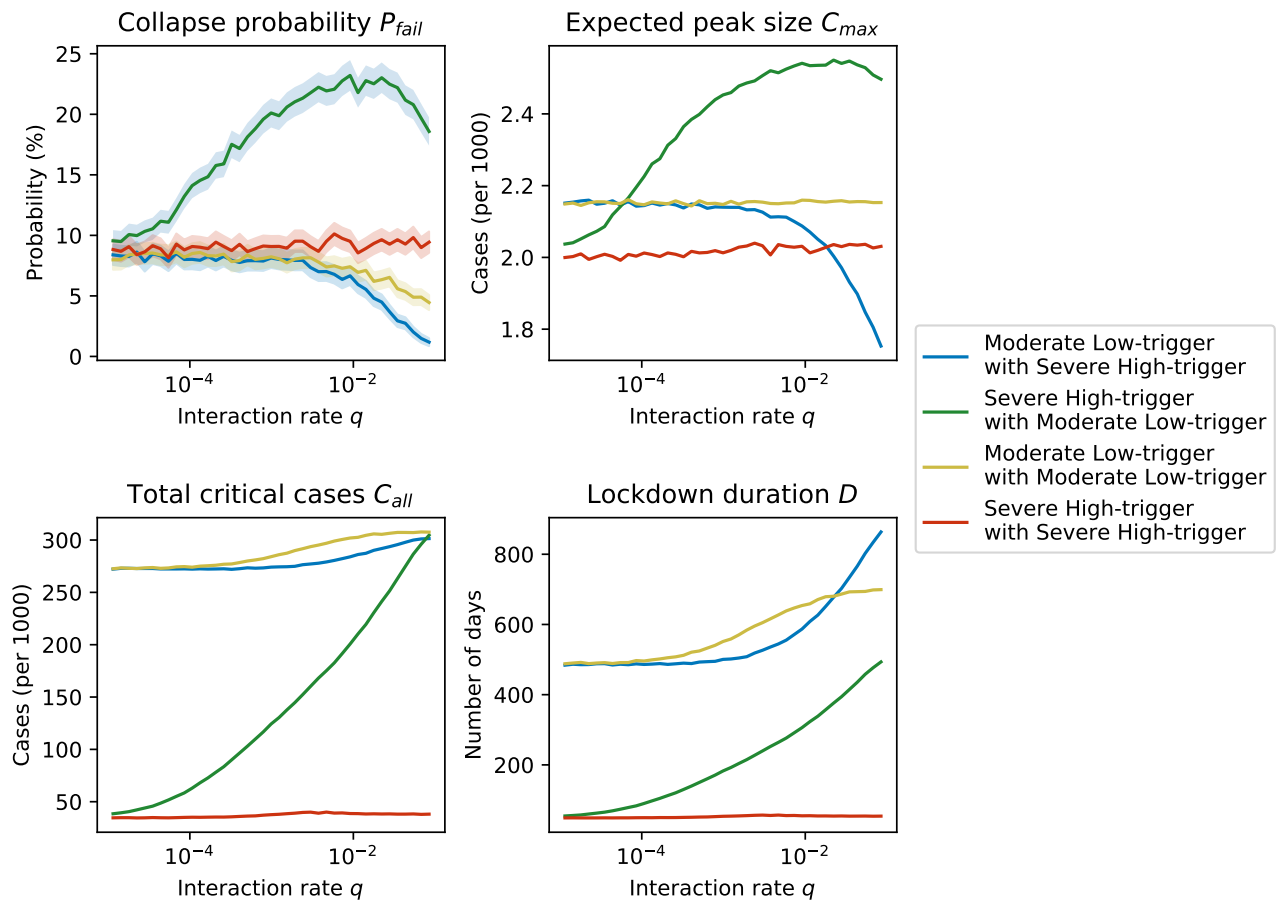

**Supplementary Figure 3. Periods following a distribution.** We consider a setting in which the random variables corresponding to the pre-infectious period  $X_{E \rightarrow I}$ , the infectious period  $X_{I \rightarrow R}$ , and the critical period  $X_{C \rightarrow R}$  each follow a distribution over 3 consecutive integer values, rather than being concentrated on a single value. In particular, each variable attains its expectation with probability 50% and is 1 lower or 1 higher with probability 25% each. The resulting plots are qualitatively the same as in Fig. 4 from the main text.
